# Supplementary material for: Dynamic Changes in Pentraxin-3 and Neprilysin in ST Segment Elevation Myocardial Infarction
Source: MDPI journal article supplement (doi:10.3390/biomedicines10020275), 2022-01-26

## Supplementary material to:

### Dynamic changes in pentraxin-3 and neprilysin in ST segment elevation myocardial infarction

Rahel Befekadu<sup>1,2</sup>, Magnus Grenegård<sup>2</sup>, Anders Larsson<sup>3</sup>, Kjeld Christensen<sup>4</sup>, Sofia Ramström<sup>2,5</sup>

<sup>1</sup>Department of Laboratory Medicine, Section for Clinical Immunology and Transfusion medicine, Örebro University Hospital, Örebro, Sweden. <sup>2</sup>Cardiovascular Research Centre, School of Medical Sciences, Örebro University, Örebro, Sweden.

<sup>3</sup>Department of Medical Sciences, Uppsala University, Uppsala, Sweden.

<sup>4</sup>Karlstad Central Hospital, Karlstad, Sweden.

<sup>5</sup>Department of Clinical Chemistry, and Department of Biomedical and Clinical Sciences, Linköping University, Linköping, Sweden

**Supplementary Table S1:** quantitative data on levels of CRP, pentraxin-3 and neprilysin in the study population and the healthy donors.

| Marker                    | Time point                 | Median | 25 <sup>th</sup> /75 <sup>th</sup> percentile | 95% confidence interval |
|---------------------------|----------------------------|--------|-----------------------------------------------|-------------------------|
| <b>CRP (mg/L)</b>         | Acute (n=129)              | 1.9    | 0.7 / 4.3                                     | 1.5-2.6                 |
|                           | 1-3 days after PCI (n=134) | 9.4    | 4.2 / 22.1                                    | 8.2-12.7                |
|                           | 3 months after PCI (n=49)  | 1.4    | 0.6 / 3.6                                     | 0.8-2.1                 |
|                           | Healthy donors (n=40)      | 0.6    | 0.3 / 1.0                                     | 0.4-0.8                 |
| <b>PTX3 (pg/mL)</b>       | Acute (n=123)              | 6159   | 3797 / 11594                                  | 4953-7407               |
|                           | 1-3 days after PCI (n=115) | 6444   | 3858 / 10865                                  | 5613-7255               |
|                           | 3 months after PCI (n=46)  | 940    | 624 / 1367                                    | 708-1196                |
|                           | Healthy donors (n=40)      | 821    | 563 / 1274                                    | 697-1146                |
| <b>Neprilysin (pg/mL)</b> | Acute (n=137)              | 463    | 244 / 1031                                    | 351-670                 |
|                           | 1-3 days after PCI (n=136) | 418    | 141 / 1000                                    | 304-543                 |
|                           | 3 months after PCI (n=51)  | 302    | 143 / 748                                     | 243-449                 |
|                           | Healthy donors (n=40)      | 513    | 237 / 915                                     | 352-811                 |

**Supplementary Figure S1:** Plasma levels of (A) CRP (B) PTX3 and (C) neprilysin in blood samples obtained from STEMI patients before, 1-3 days and 3 months after percutaneous coronary intervention (PCI), comparing patients with patent (partially open) culprit vessel to those having an occluded culprit vessel. Statistical analyses were conducted using Kruskal Wallis test followed by Dunn's multiple comparison test, the whiskers show the 10th–90th percentile with all outliers. (NS= not significant).

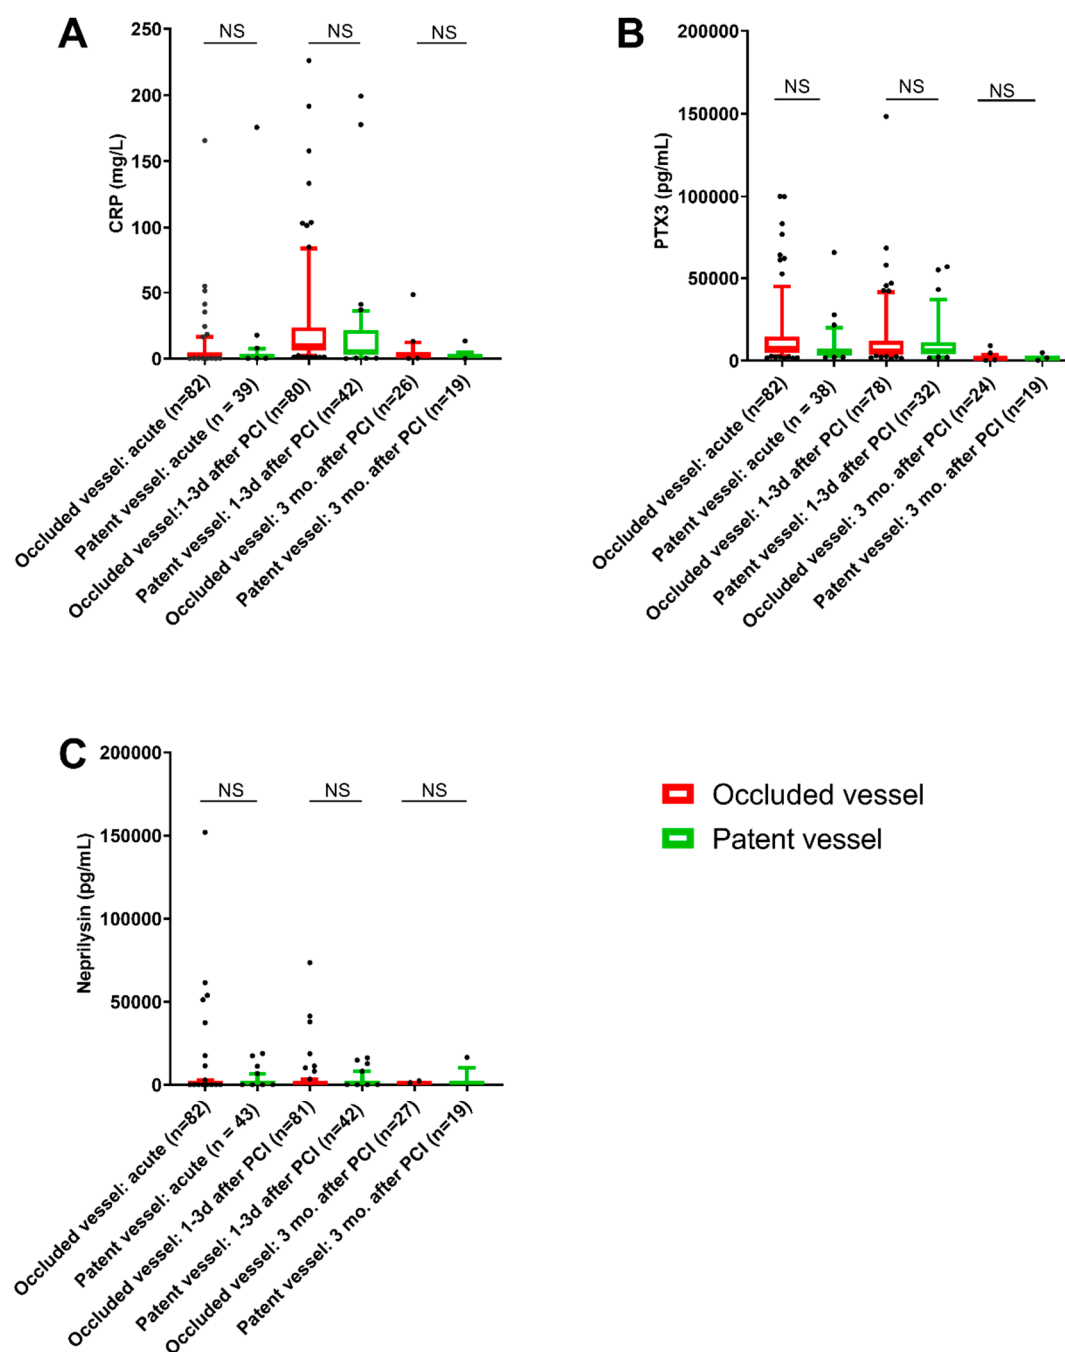

**Supplementary Figure S2:** Plasma levels of (A) CRP (B) PTX3 and (C) neprilysin in blood samples obtained from STEMI patients before, 1-3 days and 3 months after percutaneous coronary intervention (PCI), comparing patients where thrombus aspiration was performed to those who did not receive any thrombus aspiration. Statistical analyses were conducted using Kruskal Wallis test followed by Dunn's multiple comparison test, the whiskers show the 10th–90th percentile with all outliers. (NS= not significant)

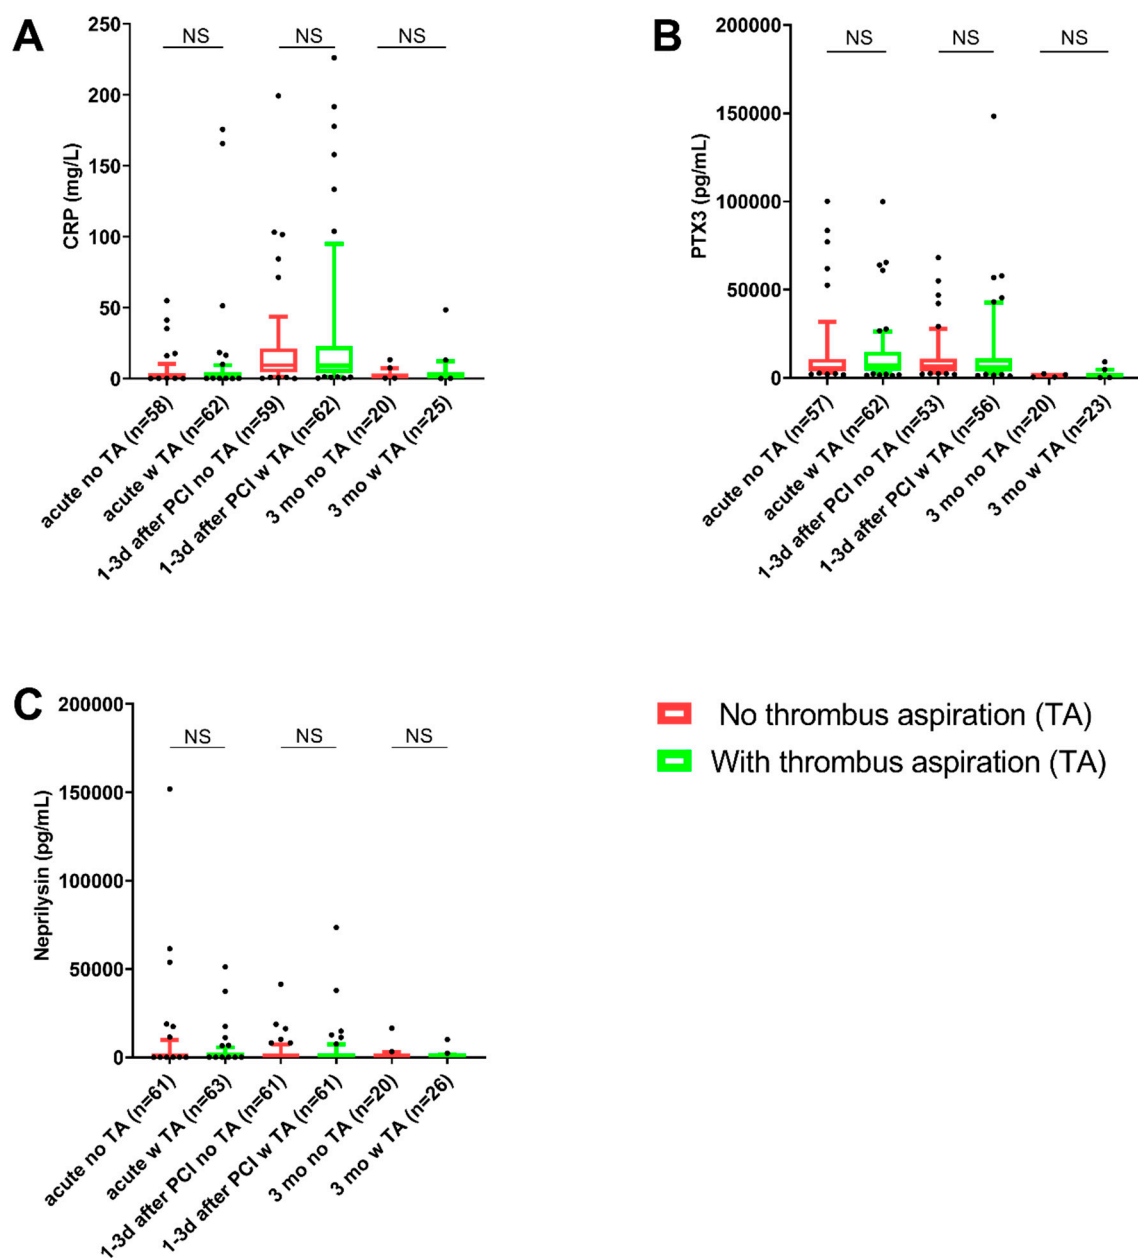

Supplement: s1 [file s1]
